# Supplementary material for: Studies in a Murine Model Confirm the Safety of Griffithsin and Advocate Its Further Development as a Microbicide Targeting HIV-1 and Other Enveloped Viruses
Source: Viruses. 2016 Nov 17;8(11):311. doi: 10.3390/v8110311 (PMC5127025; doi:10.3390/v8110311)

# Supplementary Materials: Studies in a Murine Model Confirm the Safety of Griffithsin and Advocate its Further Development as a Microbicide Targeting HIV-1 and Other Enveloped Viruses

Joseph Calvin Kouokam, Amanda B. Lasnik and Kenneth E. Palmer

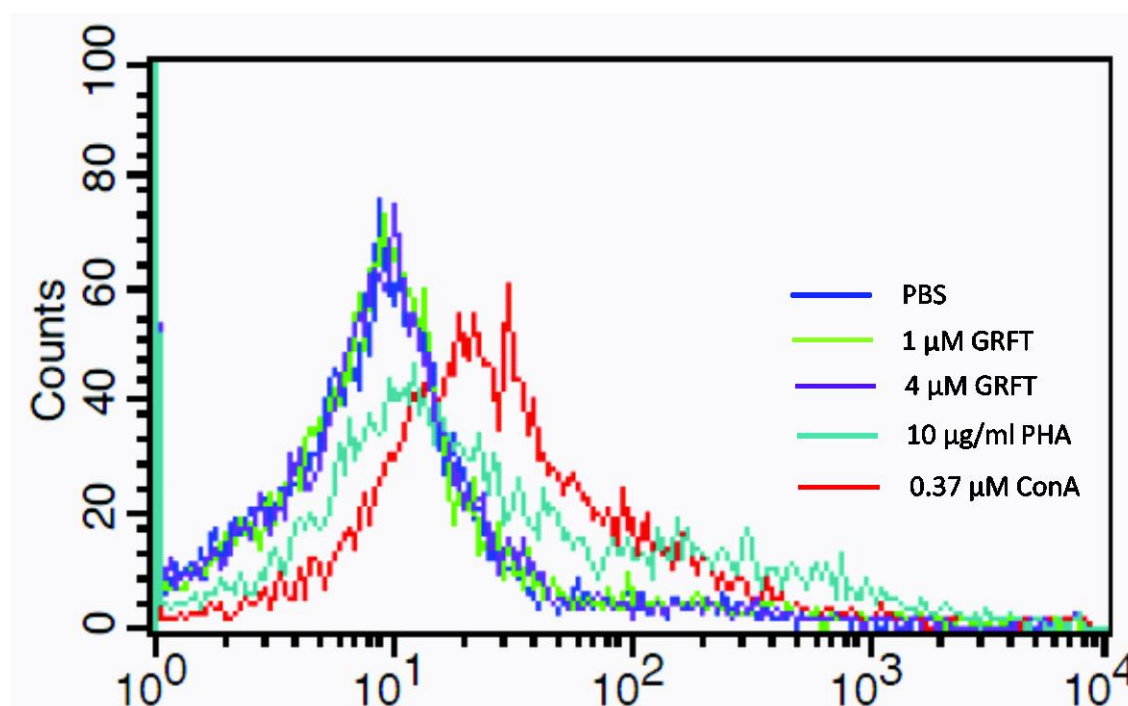

**Figure S1.** Effect of GRFT on mPBMC death. Cells were cultured for three days in presence of PBS, 1 and 4  $\mu$ M GRFT, 0.37  $\mu$ M Concanavalin A (ConA), and 10  $\mu$ g/ml phytohemagglutinin (PHA), respectively. Prior to flow-cytometry analysis, cells were loaded with 1  $\mu$ g/ml propidium iodide (PI). Flow cytometry histograms of mPBMCs treated with GRFT (1 or 4  $\mu$ M) were similar to that obtained for PBS treated cells. PHA and ConA overtly induced cell death as reflected by a shift in histograms (increased PI staining) in comparison with PBS or GRFT treated cells.

**Table S1.** Effect of single subcutaneous dose of 50 mg/kg GRFT on blood chemistry parameters.

| Parameter       | Unit  | 7 Days Post Treatment |                          | 14 Days Post Treatment |              |
|-----------------|-------|-----------------------|--------------------------|------------------------|--------------|
|                 |       | PBS                   | GRFT                     | PBS                    | GRFT         |
| ALB             | g/dL  | 4.3 ± 0.4             | 3.8 ± 0.1                | 2.5 ± 0.5              | 3.0 ± 1.5    |
| ALP             | AU    | 100.0 ± 33.1          | 147.3 ± 7.8 <sup>1</sup> | 100.0 ± 5.3            | 144.2 ± 49.3 |
| ALT             | AU    | 100.0 ± 64.1          | 76.4 ± 25.1              | 100.0 ± 13.1           | 159.0 ± 50.1 |
| AMY             | AU    | 100.0 ± 13.4          | 102.8 ± 3.9              | 100.0 ± 14.0           | 169.6 ± 76.9 |
| TBIL            | mg/dL | 0.2 ± 0.0             | 0.5 ± 0.6                | 0.6 ± 0.3              | 0.6 ± 0.3    |
| BUN             | mg/dL | 21.3 ± 4.2            | 21.7 ± 4.2               | 26.0 ± 1.0             | 27.3 ± 7.6   |
| Ca              | mg/dL | 11.3 ± 0.1            | 11.6 ± 0.4               | 11.0 ± 0.8             | 14.0 ± 4.1   |
| PHOS            | mg/dL | 10.5 ± 0.4            | 11.2 ± 1.4               | 10.6 ± 0.9             | 13.8 ± 4.4   |
| CRE             | mg/dL | <0.2                  | <0.2                     | 0.3 ± 0.1              | 0.3 ± 0.0    |
| GLU             | mg/dL | 186.7 ± 41.3          | 197.0 ± 39.6             | 171.7 ± 34.8           | 261.8 ± 47.7 |
| Na <sup>+</sup> | mEq/L | 158.7 ± 0.6           | 160.0 ± 2.6              | n.d.                   | n.d.         |
| K <sup>+</sup>  | mEq/L | >8.5                  | >8.5                     | n.d.                   | n.d.         |
| TP              | g/dL  | 5.8 ± 0.3             | 5.6 ± 0.4                | 6.1 ± 0.4              | 7.5 ± 2.5    |
| GLOB            | g/dL  | 1.5 ± 0.1             | 1.7 ± 0.4                | 3.6 ± 0.5              | 4.4 ± 1.3    |
| Cholesterol     | mg/dL |                       |                          | 63.3 ± 9.1             | 107.0 ± 48.6 |

ALB, albumin; ALP, alkaline phosphatase; ALT, alanine transaminase; AMY, amylase; BUN, blood urea nitrogen; Ca, calcium; CHOL, cholesterol; CRE, creatinine; GLOB, globulin; GLU, glucose; PHOS, phosphorus; TBIL, total bilirubin; TP, total protein; AU, arbitrary units; n.d., not determined.

<sup>1</sup> Statistical significance at  $p < 0.05$ .

**Table S2.** Effect of single subcutaneous dose of 50 mg/kg GRFT on mouse hematological profile.

| Cell Type    | Parameter | Unit       | PBS            | GRFT           |
|--------------|-----------|------------|----------------|----------------|
| Leucocytes   | WBC       | k/ $\mu$ L | 7.9 ± 1.2      | 9.0 ± 3.2      |
|              | NE        | k/ $\mu$ L | 2.1 ± 0.3      | 2.0 ± 0.7      |
|              | LY        | k/ $\mu$ L | 4.9 ± 0.7      | 5.9 ± 2.3      |
|              | MO        | k/ $\mu$ L | 0.7 ± 0.2      | 0.9 ± 0.2      |
|              | EO        | k/ $\mu$ L | 0.1 ± 0.1      | 0.1 ± 0.0      |
|              | BA        | k/ $\mu$ L | 0.0 ± 0.0      | 0.1 ± 0.0      |
| Erythrocytes | RBC       | M/ $\mu$ L | 10.0 ± 1.9     | 10.5 ± 0.7     |
|              | Hb        | g/dL       | 14.5 ± 2.5     | 14.9 ± 0.6     |
|              | HCT       | %          | 61.5 ± 11.8    | 64.6 ± 5.0     |
|              | MCV       | fL         | 61.4 ± 0.8     | 61.8 ± 1.0     |
|              | MCH       | pg         | 14.5 ± 0.6     | 14.3 ± 0.7     |
|              | MCHC      | g/dL       | 23.7 ± 0.8     | 23.2 ± 1.4     |
|              | RDW       | %          | 17.5 ± 0.7     | 17.4 ± 0.1     |
| Thrombocytes | PLT       | k/ $\mu$ L | 1294.7 ± 213.9 | 1222.5 ± 177.4 |
|              | MPV       | fL         | 3.3 ± 0.3      | 3.3 ± 0.3      |

Mice were treated with a single dose of 50 mg/kg GRFT and sacrificed at 14 days for analysis. WBC, white blood cell; NE, neutrophil; LY, lymphocyte; MO, monocyte; EO, eosinophil; BA, basophil; RBC, red blood cell; Hb, hemoglobin; HCT, hematocrit; MCV, mean corpuscular volume; MCH, mean cell hemoglobin; MCHC, mean cell hemoglobin concentration; RDW, red cell distribution width; PLT, platelet; MPV, mean platelet volume. All values were similar between both groups ( $p > 0.05$ ).

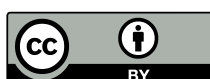

Supplement: Supplementary file 1 [file viruses-08-00311-s001.pdf]
